1 **Title Page**

2

3 **Title: “Destructive fishing” – a ubiquitously used but vague**  
4 **term? Usage and impacts across academic research,**  
5 **media, and policy**

6

7 Running Title (40 characters): Defining Destructive Fishing

8

9 **Authors**

10

11 **David F. Willer**<sup>a\*</sup>, **Joshua I. Brian**<sup>a, b</sup>, **Christina J. Derrick**<sup>c</sup>, **Marcus Hicks**<sup>a</sup>, **Alerick Pacay**<sup>d</sup>,  
12 **Arlie H. McCarthy**<sup>a</sup>, **Sophie Benbow**<sup>d</sup>, **Holly Brooks**<sup>e</sup>, **Carolina Hazin**<sup>f</sup>, **Nibedita Mukherjee**<sup>g</sup>,  
13 **Chris J McOwen**<sup>e</sup>, **Jessica Walker**<sup>d</sup>, **Daniel Steadman**<sup>d</sup>

14

15 <sup>a</sup> Department of Zoology, University of Cambridge, The David Attenborough Building, Pembroke  
16 Street, Cambridge, CB2 3QZ, UK

17 <sup>b</sup> Department of Geography, King’s College London, WC2B 4BG

18 <sup>c</sup> Independent researcher, UK

19 <sup>d</sup> Fauna & Flora International, The David Attenborough Building, Pembroke Street, Cambridge, CB2  
20 3QZ, UK.

21 <sup>e</sup> UN Environment Programme World Conservation Monitoring Centre (UNEP-WCMC), 219  
22 Huntingdon Rd, Cambridge, CB3 0DL, UK

23 <sup>f</sup> BirdLife International, The David Attenborough Building, Pembroke Street, Cambridge, CB2 3QZ, UK

24 <sup>g</sup> CBASS, Brunel University London, Uxbridge, UK

25

26 **\* Correspondence**

27 David F. Willer

28 [dw460@cam.ac.uk](mailto:dw460@cam.ac.uk)

29 Department of Zoology, University of Cambridge, The David Attenborough Building, Pembroke Street,  
30 Cambridge, CB2 3QZ, UK

31

32

## 33 **Abstract**

34

35 250 words containing title keywords and six keywords

36

37 The term “destructive fishing” appears in multiple international policy instruments intended to improve  
38 outcomes for marine biodiversity, coastal communities and sustainable fisheries. However, the  
39 meaning of “destructive fishing” is often vague, limiting effectiveness in policy. Therefore, in this study  
40 we systematically reviewed the use of “destructive fishing” in three record types: academic literature,  
41 media articles, and policy documents between 1976 - 2020. A more detailed analysis was performed  
42 on sub-sets of these records, considering the extent to which the term is characterised, geographic  
43 distribution of use, and specific impacts and practices associated with the term. We found that use of  
44 “destructive fishing” relative to the generic term ‘fisheries’ has increased since the 1990s. Records  
45 focused predominantly on fishing practices in South-eastern Asia, followed by Southern Asia and  
46 Europe. The term was characterised in detail in only 15% of records. Habitat damage and  
47 blast/poison fishing were the most associated ecological impacts and gear/practices, respectively.  
48 Bottom trawling and unspecified net fishing were regularly linked to destructive fishing. Importantly,  
49 the three record types use the term differently. Academic literature tends to specifically articulate the  
50 negative impacts, while media articles focus generally on associated gears/practices. Significant  
51 regional variation also exists in how the term is used and what phenomena it is applied to. This study  
52 provides evidence and recommendations to inform stakeholders in any future pursuit of a unified  
53 definition of “destructive fishing” to support more meaningful implementation of global sustainability  
54 goals.

55

## 56 **Key Words**

57 (6, not including words in title, alphabetical order)

58 conservation, fishing policy, food security, marine environment, ocean habitat, sustainable fishing

59



61 **Table of Contents**

62 ***Title Page***.....

63 ***Abstract***.....

64 ***Main Text***.....

65 **Introduction**.....

66 **Methods**.....

67 **Results**.....

68 **Discussion**.....

69 ***Acknowledgements***.....

70 ***Data Availability Statement***.....

71 ***References***.....

72 ***Tables***.....

73 ***Figure Legends***.....

74

75

76

77

78

79

## 80 **Main Text**

81

## 82 **Introduction**

83

84 Wild capture fisheries are a cornerstone of the global food system, drawing from enormously  
85 productive and diverse ocean ecosystems to feed billions of people. Food from the ocean currently  
86 accounts for 17% of global edible meat production (Costello et al., 2020), and marine capture and  
87 mariculture production stood at 115.2 Mt in 2020 (FAO, 2020). Sustainably managed marine fisheries  
88 have the potential to contribute to several societal needs, including ending poverty, ending hunger,  
89 decent work, reducing inequality, climate action and restoring marine biodiversity (Singh et al., 2018).  
90 Consequently, the need to tackle negative aspects of fisheries is embedded in international, regional  
91 and national policy frameworks and action plans (Singh et al., 2018). As with any policies arising from  
92 consensus-driven processes, moving from political ambitions to implementation is an enduring  
93 challenge (Armitage et al., 2020; Liuzza, 2021; Sorkar, 2020). A well-established component of this  
94 challenge is interpreting the language of global goals and their associated targets, particularly where  
95 texts of agreements, or related resolutions or measures, are legally binding for terms that are vague  
96 (King, 2017; UNESCO, 2020).

97 Where goals, targets and indicators have been established and gained global traction, efforts have  
98 been made to develop a more coherent, shared understanding of key words, phrases or concepts  
99 within relevant frameworks and amongst relevant stakeholder groups. In the fields of marine  
100 conservation and fisheries management, several recent examples exist of definition-setting and  
101 indicator-setting processes to aid the interpretation of terminology. These include definition-setting  
102 processes for the terms “other effective conservation measures” (a term in the UN Convention on  
103 Biological Diversity) (Alves-Pinto et al., 2021), “industrial fishing” and “levels/scales” of Marine  
104 Protected Areas (Grorud-Colvert et al., 2021), and “illegal, unregulated and unreported fishing”  
105 (Macfadyen et al., 2019). It is vital to note that these are explicitly political processes. This often  
106 means the need to satisfactorily resolve negotiations or political disputes, and reconcile collisions of

107 divergent worldviews, interests and value systems, drives outcomes as much as – if not more so –  
108 than scientific and linguistic definitions surrounding the focal terms (J. C. Rice, 2011).

109 One of the most relevant global policy ambitions to fisheries is Sustainable Development Goal (SDG)  
110 14 Life Below Water, particularly Targets 14.4 (“effectively regulate harvesting”) and 14.6 (“prohibit  
111 certain forms of fisheries subsidies”). These targets collectively refer to three problematic dimensions  
112 of fisheries: “overfishing”, “illegal, unreported and unregulated fishing (IUU)” and “destructive fishing  
113 practices”. Whilst there are established indicators to monitor progress towards ending “overfishing”  
114 and “IUU”, no such indicator exists for “destructive fishing”, limiting the effectiveness of “destructive  
115 fishing” as a policy term.

116 PLACEHOLDER FIGURE 1

117 PLACEHOLDER TABLE 1

118 The terms “destructive fishing” and “destructive fishing practices” appear in at least five multi-lateral  
119 policy frameworks in addition to the SDGs (Figure 2, Table 2), all of which seek to “end”, or “prohibit”  
120 this problem. The intent of these suggested prohibitions encompasses supporting ecosystem  
121 recovery and sustainable resource use. The specific practices considered to be destructive also vary  
122 and include “dynamiting”, “poisoning” and “bottom trawling”, on certain habitats.

123 PLACEHOLDER FIGURE 2

124 PLACEHOLDER TABLE 2

125 In a 2009 UNEP/FAO expert workshop, “destructive fishing” was described alongside “IUU” and  
126 “overfishing” as a sub-component of the term “unsustainable fishing” (FAO/UNEP, 2009). In this  
127 workshop “destructive fishing” was described as “the use of fishing gears in ways and places...[such  
128 that]...one or more ecosystem components are obliterated, devastated or ceases to be able to  
129 provide essential ecosystem functions” (Table 1). This description has not been formally ratified as an  
130 internationally agreed definition. The description also states that “only a very small number of fishing  
131 gears or fishing methods are recognized as inherently ‘destructive’ wherever and however they are  
132 used, the primary examples being explosives and synthetic toxins. In the absence of any formal  
133 agreement regarding the term, the classification of a gear or practice as destructive is a policy choice

134 related to pre-set objectives and consistent with national and international law” (page 9 in FAO/ENEP,  
135 2009).

136 This summary alludes to an unresolved tension of values/worldviews around the discussion of  
137 “destructive fishing” that (J. C. Rice, 2011) expands on, noting that FAO and UNEP experts in the  
138 cited workshop differed significantly in their approaches to synthesising the evidence they presented  
139 in support of an improved definition. Recognising historical tensions and barriers to meaningful  
140 progress is vital to inform any future attempt to improved shared understanding of “destructive  
141 fishing”. In particular, tensions have been around 1. Whether scientists and/or experts should  
142 explicitly direct policy-makers as to which practices are “categorically harmful or acceptable” and 2.  
143 Divergence in expert opinion as to the relative inherent destructiveness of specific fishing gears.  
144 Interestingly, while the workshop itself appears to have been seen as productive, the subsequent  
145 involvement of individuals beyond original participants fostered further intersectoral tensions resulting  
146 in attempts to accommodate an unwieldy number of perspectives, thereby hindering the imperative to  
147 make the term more specific (J. C. Rice, pers. comm).

148 In addition to its presence in a multitude of policy fora, the term “destructive fishing” frequently occurs  
149 in popular ocean discourse and is used by a range of other societal actors (e.g., academic literature,  
150 NGO campaigns, media coverage) (Ochave, 2016; Odvek, 2021). This is perhaps not surprising given  
151 that the word “destructive” is one with strongly negative associations. When such words are used in a  
152 public discourse without context or in a vague manner, they can drive intersectoral and political  
153 polarisation (Cap, 2017). We hypothesise that “destructive fishing” and “destructive fishing practices”  
154 have the potential to become and indeed are predominantly utilised as “quasi-concepts”. The terms  
155 as they stand are, in effect, “flexible enough to allow the meanderings and necessities of political  
156 action from day to day” (Bernard, 1999). Therefore, it is critical to assess the use of “destructive  
157 fishing” across the areas it is used, which includes the media and academia as well as in policy  
158 documents, to develop a definition which is accurate and useful in informing global policy.

159 We think that a unified definition of “destructive fishing” would produce benefits for sustainable  
160 fisheries management and marine conservation by reducing intersectoral polarisation on the  
161 definition, increasing alignment of political objectives and influencing “on the water” implementation of  
162 those objectives. Recognising the political nature of definition-setting and the challenges faced by



163 previous attempts to gain consensus around the term, we seek to justify why a unified definition is  
164 required and provide a comprehensive overview of current usage of the term to inform progress  
165 towards an acceptable and practical definition. Through systematically reviewing the term's usage in  
166 English-language academic articles, media articles and policy documents, we will attempt to explain  
167 the drivers of its use and consider the consequences of leaving the term undefined. Specifically, we  
168 aim to address the following questions:

- 169 1. Has the term's relative usage over time increased?
- 170 2. How is its English-language use distributed geographically?
- 171 3. How often is the term explicitly characterised or explained?
- 172 4. What specific impacts (environmental, social and/or economic) are associated with the term's  
173 usage?
- 174 5. What is the scope of the term's usage in relation to specific "practices/gear types" that are  
175 referred to as "destructive"?

176

177

## 178 **Methods**

179

### 180 *Data extraction*

181 References to destructive fishing were extracted for academic literature, policy documents, and media  
182 articles (Table 3), in the English language only. All databases were searched using the term  
183 “destructive fishing”, and records were extracted if the term was found in the in the title,  
184 abstract/introduction and/or body text of records. Academic literature was extracted from the Scopus  
185 (Elsevier) database on the 1<sup>st</sup> of March 2021; this database contains records from approximately  
186 35,000 journals in the life, social, physical and health sciences. Policy documents were extracted from  
187 the FAOLEX (United Nations) database on the 4<sup>th</sup> of October 2021; this database is administered by  
188 the Food and Agriculture Organisation, and is one of the largest online repositories of national laws,  
189 regulations and policies on food, agriculture and natural resources management. Media articles were  
190 extracted from the Factiva (Dow-Jones) database on the 5<sup>th</sup> of August 2021; this database combines  
191 over 30,000 newspaper, website and online news sources. All articles up until the search date were  
192 included, so the three searches cover slightly different time periods. In addition, the date of earliest  
193 record varied between the three databases; we controlled for this discrepancy where appropriate (see  
194 below). To justify our selection of English language only content, we briefly screened all three  
195 databases for the term in Spanish (“pesca destructiva”). This screening returned 3.5% (n=5) of policy  
196 and legal documents, 5.8% (n=274) of media articles and no academic articles.

197 Subsets of the English language extracts were selected for more detailed analysis and  
198 characterisation (see below). We selected a subset of records from each database because the  
199 volume of total records (particularly of media articles) would mean detailed analysis would be  
200 prohibitively time-consuming. For policy and academic records, we analysed those most likely to be  
201 explicitly concerned with destructive fishing, rather than just mentioning it in passing (see “Rationale  
202 for selecting analytical subset” in Table 3). For media articles, no reasonable criteria existed and so a  
203 random sample was chosen, with the sample size determined by the number of records required to  
204 be statistically representative at the 95% confidence level. To ensure the difference in 2021 coverage  
205 did not bias results, we excluded 2021 records from all subsets.

206

207 TABLE 3 PLACEHOLDER

208

209 *Temporal analysis*

210 To calculate the rate of publications concerning “destructive fishing” (i.e., temporal publication trends),  
211 while accounting for the increased background rate of publications generally, we first took the total  
212 number of relevant records extracted from each database (“Initial extract” in Table 3), and calculated  
213 the number of records per year. Then, we searched each database again using the term “fishery OR  
214 fisheries”, and extracted the total number of records per year. For each database, we then divided the  
215 total number of “destructive fishing” records per year from the total number of “fishery OR fisheries”  
216 records per year, to generate a “relative publication rate” metric that tracked terminological use  
217 relative to all content in this topic domain. In other words, this metric gives the proportion per year of  
218 all records to do with fish and fisheries that mention destructive fishing, and thus provides a fair  
219 estimate of the rate of increase or decrease in interest in destructive fishing while accounting for  
220 background publication trends. To allow comparison among record types on the same axis scale, we  
221 limited the years to be between 1980 and 2020 for this analysis; <5% of records were before 1980 in  
222 all of the databases.

223

224 *Geographical distribution*

225 For the subset of records chosen for in-depth analysis, we determined the geographical distribution of  
226 records by recording the focal country/region in the academic literature, media articles and policy  
227 documents, which we used to plot the overall distributions of regions of interest for each record type.  
228 In addition, if the information was available, we also recorded its geographical origin (i.e. the home  
229 country of its host publication; see Dataset S1). Countries were subsequently assigned to a region  
230 based on either its “sub-region name” or “intermediate region name” according to (UNSD, 2021).  
231 Records that were global in scope or did not specify a focal country were discarded for this analysis  
232 only. In total, the focus region could be determined for 471 out of 522 records (36/52 academic,  
233 113/115 policy, 322/355 media).

234

235 *Characterisations and associated impacts and practices*

236 For the subset of records that were chosen for in-depth analysis (focal articles), information relating to  
237 the use of the term “destructive fishing” was characterised in three ways. First, we recorded whether  
238 the record provided a characterisation or explanation specifically of the term destructive fishing; if so,  
239 we recorded the characterisation and noted its key properties. We then undertook additional  
240 quantitative analysis to note where the term was associated with specifically named negative impacts  
241 and practices/gears (i.e. that were inferred as being destructive through contextual use), described in  
242 the next two paragraphs. We have provided information for each record in the subset, in addition to  
243 their geographical distribution and how we coded their listed impacts and gear types, in Dataset S1.

244 Second, we carried out a form of iterative analysis, following (Srivastava & Hopwood, 2009), to  
245 document the impacts associated with the use of the term, as described by our records. We began by  
246 reading a small selection of the focal articles while asking the question ‘what specific impacts do  
247 these authors link with destructive fishing’ and writing individual entries for the specific impacts listed  
248 in each. During this initial process it became clear that each entry belonged in one of three  
249 thematically grouped categories: environmental, social or economic changes. We therefore  
250 established these categories as overarching themes, and then arranged individual entries into  
251 subcategories we developed that nested within each theme (e.g. “destroying coral reefs” and “ripping  
252 up seagrass” would both be classed in the ‘Habitat destruction’ subcategory in the environmental  
253 theme). These subcategories were then further developed in iterative fashion, by reading the rest of  
254 the focal articles and placing described impacts into the different subcategories, adjusting or adding  
255 subcategories where necessary. This ensured that the nuance in the impacts listed had been  
256 captured by our themes and subcategories, thus reconciling the relationship between what the data  
257 said and what we wanted to know (Srivastava & Hopwood, 2009). This process led to six  
258 subcategories in the social theme, five in the environmental theme and four in the economic theme.  
259 To ensure both consistency and reliability in categorisation, the iterative analysis was carried out by  
260 two authors (A.P. and J.W.) who developed the subcategories, checked each other’s categorisations  
261 and agreed upon the final classifications.

262 Third, we explored the specific practices/gear types that were associated with the term “destructive  
263 fishing.” Based on the expert knowledge of the author group (i.e. in contrast to the content analysis

264 above) we *a priori* identified three categories that practices could fall into: 1. The use of a specific  
265 fishing gear (e.g., beach seines), 2. The use of an auxiliary device/gear component (e.g. lights on  
266 catching devices) or 3. Other practices/fishing-associated behaviours (e.g. “trash fishing”). Where  
267 references to practices were sufficiently detailed in the reference to specific gears and/or auxiliary  
268 devices, we used the classification system in (He et al., 2021), which is an objective, multi-lingual  
269 lexicon of fishing technology developed by FAO gear technologists. From our records, we identified  
270 40 separate fishing practices associated with the term “destructive fishing” across the three content  
271 types; 24 identifiable fishing gears, five auxiliary fishing devices and 11 other fishing practices/fishing  
272 associated behaviours. We calculated the proportion of references to each fishing practice and  
273 derived a mean proportion across all content types; practices with a mean proportion of less than 2%  
274 were discarded from further analysis.

275 Finally, we carried out an additional cross-table analysis to break the impacts and gears down by  
276 record type (academic, media or policy) and geographic distribution (at a continental scale, with  
277 Central and South America being combined), to determine if there were different trends between  
278 continents for listed gear types and impacts. To account for the different numbers of total records  
279 between continents, we calculated the percentage of records within each document type and  
280 continent that mention a specific impact or gear type, excluding those groups where there were <3  
281 total records (Table S1 Gears, Table S2 Impacts).

282

283

## 284 **Results**

285

286 The study reveals a large increase in the use of the term “destructive fishing” in academic literature,  
287 media articles, and policy documents over the past four decades, even while accounting for increases  
288 in the background publication rate (Figure 3). It is notable that the highest publication rate values for  
289 academic literature and policy documents occur after the 2015 Agenda for Sustainable Development,  
290 the process that created the SDGs. Similar sized spikes occur in academic records in the mid 1990s  
291 after the development of the Code of Conduct for Responsible Fisheries in 1995; the fact that these

292 spikes are not reflected in national policy records logically suggests a time lag between the ratification  
293 of global instruments and their inclusion in national decision-making frameworks, although it is notable  
294 that policy documents have seen the sharpest overall increase in usage rate.

295 Media usage of the term has risen the least sharply of the three content types and its only notable  
296 spike comes after UN Resolution 59/25 (on deep-sea fisheries) in 2004, which explicitly refers to  
297 case-specific instances of high seas bottom trawling as “destructive fishing” (Table 2). This initial  
298 adoption by the UN General Assembly to introduce more precaution into how high seas fisheries are  
299 managed was followed by an intense period of political campaigning (between 2005-2008) for a  
300 moratorium on high seas bottom trawling (Carmine et al., 2020).

301 PLACEHOLDER FIGURE 3

302 Most records across academia, media, and policy relating to “destructive fishing” focus on practices in  
303 South-eastern Asia (61%, 38% and 23% of academic, media, and policy respectively) (Figure 4). This  
304 is followed by Southern/Western Asia, Oceania, and East/South Africa which each represented at  
305 least 5% of the academic, media, and policy records. Some of these differences are striking: for  
306 example, there were no academic articles focusing on destructive fishing in the Americas, and very  
307 few in Europe, in contrast to low- and middle-income regions in the tropics which were  
308 disproportionately represented in the academic literature.

309 There were also clear discrepancies between the distribution of record types between geographic  
310 regions. For example, North America and Europe had the greatest proportion of their records coming  
311 from the media, while Southeast Asia and Southeast Africa had the greatest proportion of their  
312 records coming from academic articles. Oceania, Central America and West/North Africa had the  
313 greatest proportion of their records coming from policy documents (Figure 4).

314

315 PLACEHOLDER FIGURE 4

316

317 The term “destructive fishing” was only defined and/or characterised in 13% of the academic literature  
318 (n=7, out of 52), 19% of policy documents (n=22, out of 115) and 14% of media articles (n=50, out of  
319 355). A sub-set of those characterisations are presented in Table 4.

320

321 PLACEHOLDER TABLE 4

322

323 Across the records, environmental, economic, and social impacts associated with “destructive fishing”  
324 were identified (Figure 5). The proportion of records considering all of the impacts was highest in  
325 academia, with almost all (94%) of the literature focusing on the impacts, compared to 85% of media  
326 articles, and 61% of policy documents. Environmental impacts were the most reported type of impacts  
327 across all three record types (Figure 5a); predominantly habitat damage, closely followed by target-  
328 species population decline, with the exception being a greater prevalence of target-species decline in  
329 media articles.

330 The media had the greatest focus on social impacts (30% of all reported impacts, compared to 16% in  
331 academic literature and 9% in policy), with illegality and damage to livelihoods dominating (Figure 5b).  
332 The academic literature reported economic harm the most frequently (21% of all impacts, compared  
333 to 10% in the media, and 6% of policy), with loss to local fisheries and fishers’ livelihoods being the  
334 most prevalent concern. The short-term economic benefits of destructive fishing to the individual  
335 fisher were raised in the academic literature and infrequently in the policy documents, but were not  
336 reported in the media articles. In contrast to the academic literature and media articles, policy  
337 documents focused more on environmental impacts than broader social and economic harm.

338 There were also some clear differences in the distribution of impacts listed between geographic  
339 regions. For example, within media articles, the economic losses to fisheries in the private sector  
340 caused by destructive fishing were heavily emphasised in articles from Africa and Asia, with little  
341 mention in media articles from other continents (Table S2). In contrast, the environmental impacts of  
342 habitat damage and non-target species decline were disproportionately mentioned in media articles  
343 from Europe and North America, with a much lower rate of mention in Africa and Asia; whilst the  
344 decline of target species was mentioned fairly evenly across media articles from all continents (Table  
345 S2). This was in striking contrast to the policy documents, where the impact of the decline of target  
346 species was not mentioned in any policy document from Europe or North America.

347

348 PLACEHOLDER FIGURE 5

349

350 94% of the academic literature (n=49), 49% (n=56) of policy documents and 56% of media articles  
351 (n=198) mentioned at least one fishing practice (Table 5). Of the 23 practices that occurred at >2%  
352 frequency, only four had an overall proportion of references above 10%; “Blast fishing” (51%) and  
353 “Poison fishing” (43%), then “Bottom trawls” (27%) and “Nets, unspecified” (15%). There was more  
354 emphasis on the first two practices in academic literature and more emphasis on the third in media  
355 articles with nets showing a more even spread.

356 The distribution of gear mentions was unevenly distributed among continents within each record type.  
357 The distribution was not consistent between record types: for example, 22% of media articles from  
358 Oceania mention purse seines (no other continent had more than 4% of media articles mentioning  
359 this) (Table S1); but then Oceania had no policy documents at all mentioning purse seine, suggesting  
360 a disjunction between the emphasis of destructive fishing placed by media and policy (Table S1).  
361 Other clear areas of potential concern for management for specific geographic regions could be  
362 identified: for example, 38% of North American policy documents mentioned set gillnets, while no  
363 other region had more than 4% of policy documents mentioning this gear type; in contrast, many  
364 media articles from Africa and Asia mentioned nets while few media articles from other continents did  
365 (Table S1). We also detected the potential importance of specificity in defining gears: for example,  
366 ‘trawls’ generally were most mentioned in media and policy from Africa and Asia, while ‘bottom trawls’  
367 were mentioned most in media and policy from North America and Europe.

368

369 PLACEHOLDER TABLE 5

370

371



## 372 Discussion

373

374 Our results illustrate that “destructive fishing” means different things to academics, media producers  
375 and policy-makers in different parts of the world, and that moving towards a shared understanding of  
376 “destructive fishing” will require reconciling a set of contrasting yet potentially equally valid  
377 approaches to the term.

378 Our study shows that in the three record types of academic literature, media articles and policy  
379 documents, the relative usage of the term “destructive fishing” has increased over time. We found that  
380 its English-language use is geographically biased towards South-eastern Asia. We found only a  
381 minority of specific characterisations in each of the three record types; at 19%, policy documents had  
382 the highest proportion. We much more frequently identified negative impacts and gear/practices  
383 associated with the term’s usage (i.e. that were inferred as being destructive through contextual use).  
384 Environmental impacts – particularly habitat damage – were the term’s most consistently associated  
385 impacts and the use of explosives and poisons to fish were the most commonly associated  
386 gears/practices, with the very separate gear/practice of bottom trawling also central to the term’s  
387 usage.

388 Building off these findings, we now acknowledge limitations of our study, summarise why we believe  
389 this term has been (and continues to be) subject to vague usage, consider the consequences of  
390 leaving the term undefined and offer recommendations for the future pursuit of a unified definition of  
391 the term.

### 392 *Research limitations*

393 The authors acknowledge that our analysis was limited by several factors. First, while we did screen  
394 for the term in one additional language (Spanish – see Methods) and found minimal additional  
395 references to the term, there would be value in additional consideration of even those limited  
396 references. In particular, this may explain the unusual trend of no academic articles concerning  
397 destructive fishing in Central and South America (Figure 4): they may have been absent in our  
398 English-language search because they were written in Spanish, and absent from our Spanish-  
399 language search because (to our knowledge) Scopus does not specifically index Spanish sources, in

400 contrast to the FAOLEX and Factiva databases. While beyond the scope of the current manuscript,  
401 we highlight the need to consider the possible evidence base available in other languages when  
402 moving forward with a wider destructive fishing discourse (Amano et al., 2016). Second, we  
403 acknowledge that trend formation (i.e. the underlying drivers of why a concept emerges and becomes  
404 significant) is more complex than the basic terminological history we have been able to present. It is  
405 likely that the political, scientific and popular discourses around this term are confounding variables  
406 that influence one another in explaining the term's usage patterns, rather than discrete factors.  
407 Finally, while we attempted to consider the differing motivations and mandates of the three record  
408 types we drew our data from, we acknowledge contrasts in how language is used in these distinct  
409 realms of discourse. In particular, we recognise the need for more analysis of ideological bias,  
410 sentiment and positionality in further explaining why and how "destructive fishing" is prioritised in  
411 these records. Nonetheless, our results offer valuable insights from which we can consider the  
412 consequences of using the term vaguely and form recommendations for future work.

#### 413 *Why is the term "destructive fishing" used vaguely?*

414 Through considering its usage in multi-lateral policy instruments (Table 2) from the FAO Code of  
415 Conduct for Responsible Fisheries in 1995 (FAO, 1995) onwards, we see that there is a consistent  
416 call for states to "end" or "prohibit" destructive fishing. However, the intent of these measures or the  
417 negative impacts they are trying to prevent is often vague, therefore the scope of the measures or  
418 specific practices they direct states to end is often absent. By confirming that usage across our three  
419 content types is also vague, we demonstrate the need for a revised definition-setting process for the  
420 term "destructive fishing", building on past efforts to derive a unified definition (FAO/UNEP, 2009; J.  
421 C. Rice, 2011).

422 When considering examples of the term's associated negative impacts (Figure 5), we found that  
423 specific negative impacts were articulated most commonly by academic literature and least commonly  
424 by policy documents. This suggests that scientific research is the most likely record type to try to  
425 identify a specific effect around the term "destructive". This finding is complicated by the abundance  
426 and diversity of associated impacts across all three record types. While environmental harms such as  
427 "habitat damage" and social harms such as "damage to livelihoods" were relatively consistent, other  
428 identified impacts pointed towards "destructive fishing" overlapping with other, more-defined,

429 problematic dimensions of fisheries (e.g. “target species decline” and “overfishing”, “illegality” and  
430 “IUU”, “unsustainable fishing”). Separating what is “destructive” from these more established concepts  
431 is vital in ensuring clarity in the term’s future usage.

432 Regarding the term’s associated gears/practices (Table 5), we found that specific gears/practices  
433 were identified most commonly by academic literature and least commonly by media articles. This  
434 finding broadly supports the notion that scientific research is more likely to attempt to identify a  
435 specific action as “destructive” than a media article is. There is also different emphasis placed on both  
436 gears and impacts between policy and media *within* each continent (Tables S1, S2). It suggests the  
437 importance of different concepts, as deemed by policy-makers, are poorly reflected in the media, who  
438 may be more driven to generate more general interest in destructive fishing. More generally, the very  
439 different emphasis on impacts among record types (Figure 5) indicates that different stakeholders  
440 have very different interpretations on how the term should be used, providing a key reason why the  
441 term, as it stands, is so nebulous.

442 The focus on negative impacts and gear/practices associated with “destructive fishing” are perhaps  
443 also an explanation of why the term is used vaguely. These impacts and gears/practices are the most  
444 common markers associated with the term’s written use and it is discrepancy around these markers  
445 that inhibited past attempts to define the term (J. C. Rice, 2011). Selecting simple impacts and  
446 gears/practices enormously simplifies the complexities outlined in (FAO/UNEP, 2009) and the range  
447 of spatial, temporal and regional dimensions of what may constitute “destructive fishing” as well as  
448 what constitutes a “practice”. Our findings also emphasise that discourse around this term partly  
449 driven by political and value-oriented discussions of “which fishing gears cause which environmental  
450 harms”. This is instructive in explaining why the term is vague given that the discourse generally  
451 remains unresolved and polarised.

452 We emphasise that “destructive fishing” means different things to academics, media producers and  
453 policy-makers in different parts of the world, and that a shared understanding of “destructive fishing”  
454 requires reconciling a set of contrasting yet potentially equally valid approaches to the term. We see  
455 this trend emerge in three specific ways in our results. First, different gears are emphasised by the  
456 records of different continents across all of academia, media and policy (Table 5, Table S1),  
457 suggesting that different parts of the world may be subject to different destructive practices (or may

458 differentially ascribe destructive properties to a practice). Therefore, a ubiquitous approach to  
459 “destructive fishing” may benefit more from identifying *outcomes* as destructive, rather than specific  
460 gears, which vary in usage and impact throughout the world. Second, we also see a different focus in  
461 impacts between continents (Table S2), which may reflect the differing importance in fishing more  
462 broadly. In particular, media records from Africa and Asia were particularly concerned about  
463 “destructive fishing” causing a loss in fisheries income, and policy records were concerned with the  
464 decline of target species. In contrast, media from Europe and North America were more concerned  
465 with habitat damage and non-target species decline, and policy documents were not concerned at all  
466 with target species decline (Table S2). We suggest that this may reflect the increased importance of  
467 small-scale and subsistence fisheries in low/middle income tropical regions relative to high income  
468 temperate regions. The recognition that fisheries (on the whole) hold variable importance to different  
469 stakeholders and different regions is clearly an important driver of the vague use (at a global scale) of  
470 “destructive fishing”. Third, and related to the second point, we also see broad global differences in  
471 the total distribution of records (Figure 4). If a clear global use for the term “destructive fishing” is to be  
472 found, we need to ensure that the evidence base and stakeholders consulted are also global: our  
473 review suggests there is still work to be done in this area. It is particularly important to not mistake a  
474 perceived absence in one area for a complete lack of consideration; for example, Central America  
475 and West/North Africa have little discussion of destructive fishing in the media articles or academic  
476 literature analysed in this study, yet it is clearly of interest to policy-makers in these areas (Figure 4).

#### 477 *Consequences of an undefined term*

478 There remains a divide over whether to be “destructive” is to be defined by the inherent properties of  
479 a fishing gear, the case-specific nature of instances in which those gears are used, or an even wider  
480 range of parameters. For example, our study shows that the negative impacts associated with the  
481 term may include social phenomena (Fig. 5), a parameter not even considered in (FAO/UNEP, 2009).

482 The current debate around the role of bottom trawling in the future of wild capture fisheries  
483 exemplifies this schism and our results can partly help to explain why terminological unification could  
484 contribute to better informing this debate. In our study, bottom trawling was more associated with the  
485 term “destructive fishing” in media articles than in academic or policy documents. This is in contrast to  
486 the broader trend of media articles being less specific about gears/practices, suggesting that popular

487 discourse drives this association more than scientific research. The only gears/practices more  
488 frequently associated with the term were “blast fishing” and “poison fishing”, which are both already  
489 politically well-established as “destructive” and, in most jurisdictions, illegal. Given we found different  
490 specificity on the use of “trawling” versus “bottom trawling” in media and policy from different  
491 continents, our results also highlight that the nuances in different terms may be understood differently  
492 in different parts of the world, and that this needs to be constructively and openly addressed.

493 This comparison between an already marginalized, relatively regionally-specific set of practices (“blast  
494 fishing” and “poison fishing”) and bottom trawling, a globally distributed commercial practice,  
495 exemplifies the tension between the level of evidence needed to define something as “destructive”  
496 and the politics and values associated with such a process. The question of whether bottom trawling  
497 (which is generally legal) was in the same category of “inherently destructive” as blast and poison  
498 fishing (which is generally illegal) or was “case-specifically destructive” seems to have been a major  
499 contributor to the difficulties of the previous definition-setting process (J. C. Rice, 2011). Furthermore,  
500 a 2009 review of the foundational “destructive fishing” multi-lateral framework (Figure 2) - the Code of  
501 Conduct for Responsible Fisheries (in referring to global progress on article 8.4.2 “Prohibiting  
502 destructive fishing methods and practices”) - referred to bottom trawls as “implicitly covered by the  
503 measure” but noted that very few countries have interpreted it this way and implemented full  
504 prohibitions (FAO, 2009).

505 The debate over the evidence and political priorities around bottom trawling remains highly polarised;  
506 several expert review studies consistently rank its environmental impact as highest amongst fishing  
507 gears (Chuenpagdee et al., 2003; Clark et al., 2017; Fuller et al., 2008). In contrast, other studies  
508 emphasise the high degree of context-specificity in ascribing “destructive” ecological effects to this  
509 practice (Hiddink et al., 2017) and the link between the severity of its impact and the level of in-situ  
510 fisheries management (Pitcher et al., 2022). While much of this debate is complex and nuanced,  
511 enduring central questions remain around whether bottom trawling is destructive in all contexts or only  
512 in specific conditions, what it means for a fishing practice to be destructive and whether there are  
513 objective parameters to identify this status. Similar problems regarding the differential interpretation  
514 and implementation of a marine policy measure have been seen in the context Marine Protected  
515 Areas and the resulting inconsistency in the protection they provide (Grorud-Colvert et al., 2021).

516 While a unified definition of “destructive fishing” would not resolve the intersectoral, political and  
517 value-oriented tension around the relative impacts of different fishing practices, the authors believe it  
518 would contribute strongly to better informing this debate. This in turn could foster more meaningful,  
519 consistent, and even urgent, management of cases of “destructive fishing”, in line with the  
520 requirements already established by multiple global ambitions (Figure 2).

521 *Recommendations for progress towards a unified definition*

522 Our study has shown that inherent vagueness, regional variation, and deeply political schisms of  
523 interpretation may explain why global political ambitions that seek to end, prohibit or reduce  
524 “destructive fishing” have struggled to succeed. Any future process to progress towards a unified  
525 definition of “destructive fishing” and to resolve these tensions should consider the following:

526 1. Addressing context specificity and measurement around what is “destructive”: The tension  
527 over whether a practice is destructive at a fundamental or contextual level is the central driver of the  
528 vagueness of this term. This context includes both geographic context, and the forums (academic,  
529 media or policy) in which the term is discussed.

530 2. Developing a regionalised and evidence-based approach to the causal “destructive” linkages  
531 between specific fishing gears/practices and specific impacts: better capturing the interaction between  
532 gears/practices and the impacts they are associated with (across different regions) would contribute  
533 to reducing this vagueness.

534 3. Separating “destructive fishing” from other better-defined, fishery-associated terminology:  
535 Shared understanding is undermined where the term is elided or synonymised with other terms, for  
536 example, “overfishing” or “IUU fishing”. Separating what is “destructive” from what is merely  
537 “unsustainable” is particularly critical.

538 4. Recognizing (and mitigating) persistent schisms between different stakeholder groups around  
539 specific fishing practices and whether they should be considered “destructive”: The vagueness of the  
540 term also reflects long-standing and unresolved intersectoral tensions around certain practices –  
541 particularly bottom trawling and nets. Any future definition-setting process should be cognizant of  
542 these tensions and seek meaningful progress in resolving them.

543 The term “destructive fishing”, despite appearing in multi-lateral agreements and increasing in use  
544 over time, is used variably and vaguely across academic literature, media articles, and policy  
545 documents, as well as across geographical regions. Variation in how different stakeholder groups  
546 understand the term has no doubt contributed to tensions between cross-sectoral groups and  
547 hindered the use of “destructive fishing” in a constructive manner. Our study provides a basis of  
548 shared understanding for how the term is used in English-language documents that we hope will  
549 provide a foundation for future, constructive efforts to define “destructive fishing”.

550

551

552 **Acknowledgements**

553

554 We are most grateful for the input from Serge Garcia, Jake Rice, Sebastian Mathew and the  
555 International Collective in Support of Fishworkers on a previous draft of the manuscript, in addition to  
556 constructive feedback from David Aldridge and three anonymous reviewers.

557 This project was funded by a grant from the Cambridge Conservation Initiative Collaborative Fund.  
558 D.F.W. was funded by the Department of Zoology, University of Cambridge and a Henslow Fellowship  
559 at Murray Edwards College. J.I.B. was supported by a Woolf Fisher Scholarship. D.S., J.W. and S.B.  
560 were funded by Arcadia - a charitable fund of Lisbet Rausing and Peter Baldwin.

561 The authors declare no conflict of interest.

562

563 **Data Availability Statement**

564

565 All data is available in the manuscript or supplementary materials.

566

567



568 **References**

569

570

571 Alves-Pinto, H., Geldmann, J., Jonas, H., Maioli, V., Balmford, A., Latawiec, A. E.,  
572 Crouzeilles, R., & Strassburg, B. (2021). Opportunities and challenges of other effective  
573 area-based conservation measures (OECMs) for biodiversity conservation. *Perspectives in  
574 Ecology and Conservation*, 19(2), 115–120. <https://doi.org/10.1016/j.pecon.2021.01.004>

575 Amano, T., González-Varo, J. P., & Sutherland, W. J. (2016). Languages Are Still a Major  
576 Barrier to Global Science. *PLoS Biology*, 14(12), e2000933.  
577 <https://doi.org/10.1371/journal.pbio.2000933>

578 Armitage, C. S., Lorenz, M., & Mikki, S. (2020). Mapping scholarly publications related to  
579 the Sustainable Development Goals: Do independent bibliometric approaches get the same  
580 results? *Quantitative Science Studies*, 1(3), 1092–1108.  
581 [https://doi.org/10.1162/qss\\_a\\_00071](https://doi.org/10.1162/qss_a_00071)

582 Bacalso, R. T. M., & Wolff, M. (2014). Trophic flow structure of the Danajon ecosystem  
583 (Central Philippines) and impacts of illegal and destructive fishing practices. *Journal of  
584 Marine Systems*, 139, 103–118. <https://doi.org/10.1016/j.jmarsys.2014.05.014>

585 Bernard, P. (1999). La cohésion sociale : critique dialectique d'un quasi-concept. *Lien Social  
586 et Politiques*, 41, 47–59. <https://doi.org/10.7202/005057ar>

587 Cap, P. (2017). *The Language of Fear, Communicating Threat in Public Discourse*.  
588 <https://doi.org/10.1057/978-1-137-59731-1>

- 589 Carmine, G., Mayorga, J., Miller, N. A., Park, J., Halpin, P. N., Crespo, G. O., Österblom, H.,  
590 Sala, E., & Jacquet, J. (2020). Who is the high seas fishing industry? *One Earth*, 3(6),  
591 730–738. <https://doi.org/10.1016/j.oneear.2020.11.017>
- 592 Chan, A., & Hodgson, P. A. (2018). Improving Stakeholder and Authority Cooperation  
593 Among Coastal Fishing Communities Using Passive Blast Monitoring Data. 2018  
594 *OCEANS - MTS/IEEE Kobe Techno-Oceans (OTO)*, 00, 1–9.  
595 <https://doi.org/10.1109/oceanskobe.2018.8559100>
- 596 Chenoweth, F. (2014). *Liberia National Fisheries and Aquaculture Policy and Strategy 2014*.  
597 1–63. <http://extwprlegs1.fao.org/docs/pdf/lbr160051.pdf>
- 598 Chuenpagdee, R., Morgan, L. E., Maxwell, S. M., Norse, E. A., & Pauly, D. (2003). Shifting  
599 gears: assessing collateral impacts of fishing methods in US waters. *Frontiers in Ecology*  
600 *and the Environment*, 1(10), 517–524. [https://doi.org/10.1890/1540-](https://doi.org/10.1890/1540-9295(2003)001[0517:sgacio]2.0.co;2)  
601 [9295\(2003\)001\[0517:sgacio\]2.0.co;2](https://doi.org/10.1890/1540-9295(2003)001[0517:sgacio]2.0.co;2)
- 602 Clark, R., Humphreys, J., Solandt, J.-L., & Weller, C. (2017). Dialectics of nature: The  
603 emergence of policy on the management of commercial fisheries in english European  
604 Marine Sites. *Marine Policy*, 78, 11–17. <https://doi.org/10.1016/j.marpol.2016.12.021>
- 605 Costello, C., Cao, L., Gelcich, S., Cisneros-Mata, M. Á., Free, C. M., Froehlich, H. E.,  
606 Golden, C. D., Ishimura, G., Maier, J., Macadam-Somer, I., Mangin, T., Melnychuk, M.  
607 C., Miyahara, M., Moor, C. L. de, Naylor, R., Nøstbakken, L., Ojea, E., O'Reilly, E.,  
608 Parma, A. M., ... Lubchenco, J. (2020). The future of food from the sea. *Nature*,  
609 588(7836), 95–100. <https://doi.org/10.1038/s41586-020-2616-y>
- 610 DowJones. (2021, December 10). *Factiva*. <https://www.dowjones.com/professional/factiva/>

- 611 Elsevier. (2021, December 10). *Scopus*. <https://www.scopus.com/search>
- 612 FAO. (1995). Code of Conduct on Responsible Fisheries. *FAO, Rome*, 1–49.
- 613 <https://www.fao.org/3/v9878e/V9878E.pdf>
- 614 FAO. (2009). Analysis of the implementation and impact of the FAO Code of Conduct for
- 615 Responsible Fisheries since 1995. *FAO Fisheries and Aquaculture Circular, Rome*(1038),
- 616 1–99. <https://www.fao.org/3/i0604e/i0604e00.pdf>
- 617 FAO. (2015). Voluntary Guidelines for Securing Sustainable Small-Scale Fisheries in the
- 618 Context of Food Security and Poverty Eradication. *FAO, Rome*.
- 619 FAO. (2020). *The State of World Fisheries and Aquaculture 2020*. Rome.
- 620 <https://doi.org/10.4060/ca9229en>
- 621 FAO. (2021, December 10). *FAOLEX*. <https://www.fao.org/faolex/en/>
- 622 FAO/UNEP. (2009). Report of the FAO/UNEP Expert Meeting on Impacts of Destructive
- 623 Fishing Practices, Unsustainable Fishing, and Illegal, Unreported and Unregulated (IUU)
- 624 Fishing on Marine Biodiversity and Habitats. *FAO Fisheries and Aquaculture Report. No.*
- 625 *932, Rome*, 1–32.
- 626 Foster, A. (2018, October 4). Prince Harry's ex Cressida Bonas strips NAKED to pose with a
- 627 shark as she joins Paris Jackson and Elizabeth McGovern in anti-fishing campaign.
- 628 *Evening Standard*. Proquest FAC\_ENG\_4349.
- 629 [https://40plus.standard.co.uk/showbiz/harry-s-ex-cressida-bonas-poses-naked-with-shark-](https://40plus.standard.co.uk/showbiz/harry-s-ex-cressida-bonas-poses-naked-with-shark-as-she-joins-other-alist-stars-in-campaign-to-halt-overfishing-a3953386.html)
- 630 [as-she-joins-other-alist-stars-in-campaign-to-halt-overfishing-a3953386.html](https://40plus.standard.co.uk/showbiz/harry-s-ex-cressida-bonas-poses-naked-with-shark-as-she-joins-other-alist-stars-in-campaign-to-halt-overfishing-a3953386.html)

- 631 Fuller, S., Candace, P., Jennifer, F., Chih-Fan, T., Lance, M., Dorthea, H., & Ratana, C.  
632 (2008). Addressing the Ecological Impacts of Canadian Fishing Gear. *Ecology Action*  
633 *Centre, Living Oceans Society, and Marine Conservation Biology Institute.*  
634 <http://citeseerx.ist.psu.edu/viewdoc/download?doi=10.1.1.524.9193&rep=rep1&type=pdf>
- 635 Grorud-Colvert, K., Sullivan-Stack, J., Roberts, C., Constant, V., Costa, B. H. e, Pike, E. P.,  
636 Kingston, N., Laffoley, D., Sala, E., Claudet, J., Friedlander, A. M., Gill, D. A., Lester, S.  
637 E., Day, J. C., Gonçalves, E. J., Ahmadi, G. N., Rand, M., Villagomez, A., Ban, N. C., ...  
638 Lubchenco, J. (2021). The MPA Guide: A framework to achieve global goals for the  
639 ocean. *Science*, 373(6560), eabf0861. <https://doi.org/10.1126/science.abf0861>
- 640 He, B., Yan, F., Yu, H., Su, F., Lyne, V., Cui, Y., Kang, L., & Wu, W. (2021). Global  
641 Fisheries Responses to Culture, Policy and COVID-19 from 2017 to 2020. *Remote*  
642 *Sensing*, 13(22), 4507. <https://doi.org/10.3390/rs13224507>
- 643 Hiddink, J. G., Jennings, S., Sciberras, M., Szostek, C. L., Hughes, K. M., Ellis, N.,  
644 Rijnsdorp, A. D., McConnaughey, R. A., Mazor, T., Hilborn, R., Collie, J. S., Pitcher, C.  
645 R., Amoroso, R. O., Parma, A. M., Suuronen, P., & Kaiser, M. J. (2017). Global analysis  
646 of depletion and recovery of seabed biota after bottom trawling disturbance. *Proceedings*  
647 *of the National Academy of Sciences*, 114(31), 8301–8306.  
648 <https://doi.org/10.1073/pnas.1618858114>
- 649 ICSEF. (2021). *West Bengal Fisheries Policy - Government of West Bengal Department of*  
650 *Fisheries.* <https://demo.icsf.net/resources/west-bengal-fisheries-policy-2015/>
- 651 Javaid, A., Janssen, M. A., Reuter, H., & Schlüter, A. (2017). When Patience Leads to  
652 Destruction: The Curious Case of Individual Time Preferences and the Adoption of

- 653 Destructive Fishing Gears. *Ecological Economics*, 142, 91–103.  
654 <https://doi.org/10.1016/j.ecolecon.2017.06.007>
- 655 King, K. (2017). Lost in translation? The challenge of translating the global education goal  
656 and targets into global indicators. *Compare: A Journal of Comparative and International*  
657 *Education*, 47(6), 1–17. <https://doi.org/10.1080/03057925.2017.1339263>
- 658 Liuzza, C. (2021). The making and UN-making of consensus: Institutional inertia in the  
659 UNESCO World Heritage Committee. *International Journal of Cultural Property*, 28(2),  
660 261–284. <https://doi.org/10.1017/s0940739121000175>
- 661 Macfadyen, G., Hosch, G., N, K., & Tagziria, L. (2019). The Illegal, Unreported and  
662 Unregulated Fishing Index. *Poseidon Aquatic Resource Management Limited and the*  
663 *Global Initiative Against Transnational Organized Crime*. [https://globalinitiative.net/wp-](https://globalinitiative.net/wp-content/uploads/2019/02/IUU-Fishing-Index-Report-web-version.pdf)  
664 [content/uploads/2019/02/IUU-Fishing-Index-Report-web-version.pdf](https://globalinitiative.net/wp-content/uploads/2019/02/IUU-Fishing-Index-Report-web-version.pdf)
- 665 MFF. (2012). *Indonesian National Strategy Action Plan 2012-2015*. 1–33.  
666 <https://leap.unep.org/sites/default/files/legislation/ins157146.pdf>
- 667 Ochave, R. M. D. (2016, November 21). Closed fishing season in Visayas seen creating  
668 ‘artificial’ shortages. *BusinessWorld*. [https://www.bworldonline.com/closed-fishing-](https://www.bworldonline.com/closed-fishing-season-in-visayas-seen-creating-artificial-shortages/)  
669 [season-in-visayas-seen-creating-artificial-shortages/](https://www.bworldonline.com/closed-fishing-season-in-visayas-seen-creating-artificial-shortages/)
- 670 Odvek, J. (2021, November 28). SilverFish Association call for protection. *NewVision*.  
671 <https://www.newvision.co.ug/articledetails/120929>
- 672 Pitcher, C. R., Hiddink, J. G., Jennings, S., Collie, J., Parma, A. M., Amoroso, R., Mazor, T.,  
673 Sciberras, M., McConnaughey, R. A., Rijnsdorp, A. D., Kaiser, M. J., Suuronen, P., &  
674 Hilborn, R. (2022). Trawl impacts on the relative status of biotic communities of seabed

- 675 sedimentary habitats in 24 regions worldwide. *Proceedings of the National Academy of*  
676 *Sciences of the United States of America*, 119(2), e2109449119.  
677 <https://doi.org/10.1073/pnas.2109449119>
- 678 Rice, C. (2006, October 3). *White House Secretary Statement*. Proquest FAC\_ENG\_1077.
- 679 Rice, J. C. (2011). Advocacy science and fisheries decision-making. *ICES Journal of Marine*  
680 *Science*, 68(10), 2007–2012. <https://doi.org/10.1093/icesjms/fsr154>
- 681 Sage, E. (2016, December 7). Call for end to fishing techniques that are killing Tikapa  
682 Moana. *New Zealand Green Party*. Proquest FAC\_ENG\_3554.  
683 [https://www.greens.org.nz/greens-call-end-harmful-fishing-techniques-are-killing-tikapa-](https://www.greens.org.nz/greens-call-end-harmful-fishing-techniques-are-killing-tikapa-moanathe-hauraki)  
684 [moanathe-hauraki](https://www.greens.org.nz/greens-call-end-harmful-fishing-techniques-are-killing-tikapa-moanathe-hauraki)
- 685 Silva, P. (2006). Exploring The Linkages Between Poverty, Marine Protected Area  
686 Management, And The Use Of Destructive Fishing Gear In Tanzania. *Policy Research*  
687 *Working Papers*. <https://doi.org/10.1596/1813-9450-3831>
- 688 Singh, G. G., Cisneros-Montemayor, A. M., Swartz, W., Cheung, W., Guy, J. A., Kenny, T.-  
689 A., McOwen, C. J., Asch, R., Geffert, J. L., Wabnitz, C. C. C., Sumaila, R., Hanich, Q., &  
690 Ota, Y. (2018). A rapid assessment of co-benefits and trade-offs among Sustainable  
691 Development Goals. *Marine Policy*, 93, 223–231.  
692 <https://doi.org/10.1016/j.marpol.2017.05.030>
- 693 Snyder, J. (2006, May 10). Damaging deep sea-trawling ban urged. *The Hill*. Proquest  
694 FAC\_ENG\_1113. [https://thehill.com/homenews/administration/4345-damaging-deep-sea-](https://thehill.com/homenews/administration/4345-damaging-deep-sea-trawling-ban-urged)  
695 [trawling-ban-urged](https://thehill.com/homenews/administration/4345-damaging-deep-sea-trawling-ban-urged)

- 696 Sorkar, M. N. I. (2020). Framing Shaping Outcomes: Issues Related to Mitigation in the  
697 UNFCCC Negotiations. *Fudan Journal of the Humanities and Social Sciences*, 13(3),  
698 375–394. <https://doi.org/10.1007/s40647-020-00280-9>
- 699 Srivastava, P., & Hopwood, N. (2009). A Practical Iterative Framework for Qualitative Data  
700 Analysis. *International Journal of Qualitative Methods*, 8(1), 76–84.  
701 <https://doi.org/10.1177/160940690900800107>
- 702 Tun, U. W. (2011). *Myanmar National Biodiversity Strategy and Action Plan 2015-2020, The*  
703 *Republic of the Union of Myanmar*. 1–135. [https://www.cbd.int/doc/world/mm/mm-](https://www.cbd.int/doc/world/mm/mm-nbsap-01-en.pdf)  
704 [nbsap-01-en.pdf](https://www.cbd.int/doc/world/mm/mm-nbsap-01-en.pdf)
- 705 UN. (2004). Resolution 59/25. *UN General Assembly 59th Session*.  
706 <https://research.un.org/en/docs/ga/quick/regular/59>
- 707 UN. (2011). Resolution 66/288. *UN General Assembly 66th Session*.  
708 <https://research.un.org/en/docs/ga/quick/regular/66>
- 709 UN. (2016). The Sustainable Development Goals Report. *UN*, 1–54.  
710 [https://unstats.un.org/sdgs/report/2016/The%20Sustainable%20Development%20Goals%](https://unstats.un.org/sdgs/report/2016/The%20Sustainable%20Development%20Goals%20Report%202016.pdf)  
711 [20Report%202016.pdf](https://unstats.un.org/sdgs/report/2016/The%20Sustainable%20Development%20Goals%20Report%202016.pdf)
- 712 UNESCO. (2020). Global Education Monitoring Report 2020. *Global Education Monitoring*  
713 *Report*. <https://doi.org/10.18356/2ddb782c-en>
- 714 UNSD. (2021, December 7). *United Nations Statistics Division Data Platform*.  
715 <https://unstats.un.org>
- 716

717

718



719 **Tables**

720

721 Table 1. Definitions of problematic dimensions of fisheries (otherwise known as components of the  
 722 overarching term “unsustainable fishing”) referred to in SDG Targets 14.4 and 14.7 (from FAO,  
 723 UNEP, 2010) (FAO/UNEP, 2009)

| Component of<br>“unsustainable fishing” | Definition                                                                                                                                                                                                                                                     |
|-----------------------------------------|----------------------------------------------------------------------------------------------------------------------------------------------------------------------------------------------------------------------------------------------------------------|
| Overfishing                             | “A situation in which the fishing pressure exerted on the target species is higher than the pressure theoretically required for harvesting the maximum sustainable yield (MSY), or would, if continued in the medium term, impair the population productivity” |
| IUU fishing                             | “Illegal, unreported and unregulated fishing”; more detailed definition in International Plan of Action to Prevent, Deter and Eliminate Illegal Unreported Unregulated Fishing                                                                                 |
| Destructive fishing practices           | “The use of fishing gears in ways or in places such that one or more key components of an ecosystem are obliterated, devastated or ceases to be able to provide essential ecosystem functions”                                                                 |

724

725 Table 2. Contextual use of the term “destructive fishing” in five international policy instruments

| International policy instrument                      | Relevant clause/article | Intent of clause/article (i.e. desired outcome)                                                                                                    | Active phrase relating to “destructive fishing” | Scope of term                                             |
|------------------------------------------------------|-------------------------|----------------------------------------------------------------------------------------------------------------------------------------------------|-------------------------------------------------|-----------------------------------------------------------|
| Code of Conduct on Responsible Fisheries (FAO, 1995) | 8.4.2                   | “Ensuring the effective conservation, management and development of living aquatic resources, with due respect for the ecosystem and biodiversity” | “Prohibit”                                      | “Dynamiting, poisoning and other comparable... practices” |
| UN General                                           | 66                      | “Responsible fisheries in                                                                                                                          | “Consider the                                   | “Bottom trawling that has                                 |

|                                                                                                 |      |                                                                                                                                                                                        |                                   |                                                                                                                                                                        |
|-------------------------------------------------------------------------------------------------|------|----------------------------------------------------------------------------------------------------------------------------------------------------------------------------------------|-----------------------------------|------------------------------------------------------------------------------------------------------------------------------------------------------------------------|
| Assembly 59 <sup>th</sup><br>Session, Resolution<br>59/25 (UN, 2004)                            |      | the marine ecosystem”                                                                                                                                                                  | interim<br>prohibition of”        | adverse impacts on<br>vulnerable marine<br>ecosystems, including<br>seamounts, hydrothermal<br>vents and cold water corals<br>located beyond national<br>jurisdiction” |
| UN General<br>Assembly 66 <sup>th</sup><br>Session, Resolution<br>66/288. (UN, 2011)            | 168  | “Manage by-catch, discards<br>and other adverse<br>ecosystem impacts<br>from fisheries”                                                                                                | “Eliminating”                     | n/a                                                                                                                                                                    |
| Voluntary<br>Guidelines for<br>Securing<br>Sustainable Small-<br>Scale Fisheries<br>(FAO, 2015) | 5.16 | “Sustainable resource<br>management”                                                                                                                                                   | “Deter, prevent<br>and eliminate” | n/a                                                                                                                                                                    |
| UN Sustainable<br>Development Goals<br>(UN, 2016)                                               | 14.4 | “Restore fish stocks in the<br>shortest time feasible, at<br>least to levels that can<br>produce maximum<br>sustainable yield as<br>determined by their<br>biological characteristics” | “End”                             | n/a                                                                                                                                                                    |

726

727 Table 3. Description of databases used and sampling methods

|                           | <b>Academic<br/>literature</b> | <b>National policy<br/>documents</b> | <b>Media</b>             |
|---------------------------|--------------------------------|--------------------------------------|--------------------------|
| Database used             | Scopus<br>(Elsevier,<br>2021)  | FAOLEX (FAO, 2021)                   | Factiva (DowJones, 2021) |
| Initial extract (records) | 308                            | 141                                  | 4678                     |

|                                                  |                                   |                                                                                    |                                                                                                                   |
|--------------------------------------------------|-----------------------------------|------------------------------------------------------------------------------------|-------------------------------------------------------------------------------------------------------------------|
| with “destructive fishing” anywhere in text)     |                                   |                                                                                    |                                                                                                                   |
| Oldest record                                    | 1974                              | 1976                                                                               | 1981                                                                                                              |
| Rationale for selecting analytical sub-set       | Presence in title and/or abstract | Discarded any documents using the term without context i.e. a reference in passing | Random selection using a statistically representative sample with a 95% confidence level and a 5% margin of error |
| Total records used for in-depth characterisation | 52                                | 115                                                                                | 355                                                                                                               |

728

729 Table 4. Examples of the term “destructive fishing” and commonalities between examples from across  
730 record types. See Dataset S1 for full details.

| Content type    | Characterisation                                                                                                                                   | Commonalities                            |                          |                     | Focal country and reference                              |
|-----------------|----------------------------------------------------------------------------------------------------------------------------------------------------|------------------------------------------|--------------------------|---------------------|----------------------------------------------------------|
|                 |                                                                                                                                                    | Specific negative impacts                | Specific gears/practices | Specific properties |                                                          |
| Academic papers | “Fishing methods which are low cost, extremely effective regarding catch, but unsustainable due to wasted bycatch and damage to marine ecosystems” | Bycatch, Unsustainable, Ecosystem damage | n/a                      | Low cost, effective | Hong Kong, Malaysia, Philippines. (Chan & Hodgson, 2018) |
|                 | “Operations that destroy benthic habitats and result in indiscriminate fishing mortality”                                                          | Benthic damage, Indiscriminate mortality | n/a                      | n/a                 | Philippines. (Bacalso & Wolff, 2014)                     |
|                 | “Fishing gear is considered environmentally destructive if their use results in large amounts of by-catch of non-                                  | Bycatch, Environmental degradation       | n/a                      | n/a                 | Tanzania. (Silva, 2006)                                  |

|                           |                                                                                                                                                                                                       |                                                  |                           |                           |                                                                               |
|---------------------------|-------------------------------------------------------------------------------------------------------------------------------------------------------------------------------------------------------|--------------------------------------------------|---------------------------|---------------------------|-------------------------------------------------------------------------------|
|                           | target species or cause degradation of the coastal environment”                                                                                                                                       |                                                  |                           |                           |                                                                               |
|                           | “Fishing methods, gears or practices whose impact is so indiscriminate and/or irreversible that they are universally considered destructive irrespective of the environment in which they are used”   | Indiscriminate impact, Irreversible impact       | n/a                       | Universally “destructive” | Global. (Javaid et al., 2017)                                                 |
| National policy documents | “Control destructive fishing such as the use of the small-size mesh.”                                                                                                                                 | n/a                                              | Small-mesh nets           | n/a                       | India. West Bengal Fisheries Policy (ICSF, 2021)                              |
|                           | “The main threats include destructive fishing practices such as bombing and cyanide fishing”                                                                                                          | n/a                                              | Bombing, cyanide          | n/a                       | Indonesia. National Strategy and Action Plan: 2012 – 2015 (MFF, 2012)         |
|                           | “Electrofishing has emerged as a major threat, decimating fisheries as well as impacting species that depend on them, and causing direct fatalities to the Critically Endangered...Irrawaddy Dolphin” | Endangered species mortality, Fishery decimation | Electrofishing            | n/a                       | Myanmar. National Biodiversity Strategy and Action Plan 2015-2020 (Tun, 2011) |
|                           | “The juvenile mortality of these species has been increasing as a result of                                                                                                                           | Bycatch, Juvenile mortality,                     | Shrimp fishing (trawling) | n/a                       | Liberia. National Fisheries and                                               |

|                |                                                                                                                                                                                                                |                                                                     |     |                               |                                                        |
|----------------|----------------------------------------------------------------------------------------------------------------------------------------------------------------------------------------------------------------|---------------------------------------------------------------------|-----|-------------------------------|--------------------------------------------------------|
|                | increase in the by-catch rate in the shrimp fishery. This situation is aggravated by the indiscriminate use of destructive fishing methods”                                                                    | Indiscriminate                                                      |     |                               | Aquaculture Policy and Strategy 2014 (Chenoweth, 2014) |
| Media articles | "Destructive fishing practices" are practices that destroy the long-term natural productivity of fish stocks or habitats such as seamounts, corals, and sponge fields for short term gain”                     | Fish stock productivity decline, Sensitive benthic community damage | n/a | Short-term gain               | USA, Office of White House. (C. Rice, 2006)            |
|                | “Fishing practices that jeopardize fish stocks or the habitats that support them or provide a commercial advantage to those who engage in such practices that is unfair in comparison with their competitors.” | Jeopardy to fish stocks, Habitats, Unfairness                       | n/a | Provides commercial advantage | USA, The Hill (Snyder, 2006)                           |
|                | "Indiscriminate methods that destroy and degrade the sea floor habitats, damage the ecosystems and put livelihoods at risk”                                                                                    | Benthic damage, livelihood risk                                     | n/a | n/a                           | New Zealand, Green Party (Sage, 2016)                  |
|                | "... practices that are destroying marine life, hurting coastal communities, jobs and the people that depend on the ocean"                                                                                     | Marine life destruction, Socio-economic destruction                 | n/a | n/a                           | Global, Evening Standard (Foster, 2018)                |

731

732 Table 5. Fishing practices associated with the term “destructive fishing” and proportions of reference  
 733 to each practice across record types. “Fishing gears” ordered by classification in (He et al., 2021).

734 “Auxiliary devices” and “Other fishing practices” ordered alphabetically. Practices with mean  
 735 proportion of references above 25% highlighted in blue.

| Fishing practice type | Fishing practice                      | Proportion of relevant records that refer to practice |                           |                | Mean proportion across all content types | Dominant focal region across all content types |
|-----------------------|---------------------------------------|-------------------------------------------------------|---------------------------|----------------|------------------------------------------|------------------------------------------------|
|                       |                                       | Academic papers                                       | National policy documents | Media articles |                                          |                                                |
| 1. Fishing gears      | 1.1 Purse seines                      | 12%                                                   | 5%                        | 10%            | 9%                                       | Asia                                           |
|                       | 2.1 Beach seine                       | 12%                                                   | 4%                        | 0%             | 5%                                       | Africa                                         |
|                       | 2.2 Boat seines                       | 6%                                                    | 4%                        | 3%             | 4%                                       | Asia                                           |
|                       | 3. Trawls ( <i>not specified</i> )    | 4%                                                    | 4%                        | 17%            | 8%                                       | Africa                                         |
|                       | 3.1 Bottom trawls                     | 24%                                                   | 23%                       | 32%            | 27%                                      | North America                                  |
|                       | 4. Dredges                            | 4%                                                    | 0%                        | 7%             | 4%                                       | Oceania                                        |
|                       | 7.1 Set gillnets (anchored)           | 0%                                                    | 9%                        | 4%             | 4%                                       | North America                                  |
|                       | 7.2 Drift gillnets                    | 0%                                                    | 7%                        | 4%             | 4%                                       | North America                                  |
|                       | 7.x Fine-meshed nets                  | 6%                                                    | 11%                       | 8%             | 8%                                       | Africa                                         |
|                       | 7.x Gillnets ( <i>not specified</i> ) | 8%                                                    | 7%                        | 6%             | 7%                                       | Oceania                                        |
|                       | 7.x Nets ( <i>not specified</i> )     | 10%                                                   | 21%                       | 14%            | 15%                                      | Asia                                           |
|                       | 9.3 Longlines                         | 2%                                                    | 0%                        | 7%             | 3%                                       | Oceania                                        |
|                       | 10.2 Hand implements                  | 10%                                                   | 13%                       | 1%             | 8%                                       | South America                                  |
|                       | 10.4 Electric fishing                 | 6%                                                    | 9%                        | 3%             | 6%                                       | Asia                                           |
|                       | 10.5 Push nets                        | 2%                                                    | 4%                        | 2%             | 2%                                       | Africa                                         |
| 10.7 Drive-in nets    | 4%                                    | 5%                                                    | 2%                        | 4%             | Asia                                     |                                                |
| 10.8 Diving           | 6%                                    | 0%                                                    | 1%                        | 2%             | Asia                                     |                                                |
| 2. Auxiliary devices  | Fish Aggregating Devices              | 0%                                                    | 2%                        | 6%             | 2%                                       | Oceania                                        |
|                       | Lights                                | 0%                                                    | 2%                        | 4%             | 2%                                       | Africa                                         |
| 3. Other              | Blast fishing                         | 67%                                                   | 59%                       | 28%            | 51%                                      | Africa/Asia                                    |

|                      |                            |     |     |     |     |         |
|----------------------|----------------------------|-----|-----|-----|-----|---------|
| fishing<br>practices | Coral harvesting           | 0%  | 9%  | 2%  | 4%  | Oceania |
|                      | Ornamental fishing (reefs) | 0%  | 7%  | 1%  | 3%  | Asia    |
|                      | Poison fishing             | 63% | 46% | 20% | 43% | Asia    |

736

737

738

## 739 **Figure Legends**

740

741 **Figure 1. Suggested relationship between problematic dimensions of fisheries referred to in**  
742 **SDG Target 14.4 and 14.7 and their associated indicators**

743

744 **Figure 2. Presence of “destructive fishing” in multilateral ocean policy frameworks.**

745

746 **Figure 3. Change in frequency articles focusing on destructive fishing over time.** Articles are in  
747 academic literature (green line); media articles (orange line); and policy (blue line). The article  
748 frequency rate is adjusted to account for the background rate of publications on fisheries; see  
749 Methods. Vertical lines in (labelled a - i) indicate significant global policy mechanisms that impact  
750 fisheries management and conservation

751

752 **Figure 4. Map indicating the percentage of academic, media, and policy focal articles that**  
753 **focus on each global region.** Alternating shades of grey are used to represent each global region.  
754 Percentages were rounded up to the nearest whole percent, to enable records at <0.5% to be  
755 visualised, therefore some totals slightly exceed 100%.

756

757 **Figure 5. Bar charts showing the ecological, economic and social impacts of destructive**  
758 **fishing for each content type.** Ecological, economic, and social themes are grouped into key  
759 subcategories; see Methods for the process used to define these groups. Note that there was uneven  
760 emphasis on the three themes, with environmental impacts being more widely discussed than  
761 economic or social impacts, and so each y-axis is on a different scale. Main coloured images: Tracey  
762 Saxby, Integration and Application Network ([ian.umces.edu/media-library](http://ian.umces.edu/media-library)). Small icons from the Noun  
763 Project (website icon, Syawaluddin; policy document icon, iconixar; academic icon, general Noun  
764 project).





**Target**

*14.4: By 2020, effectively regulate harvesting, and end:*

*14.6: Prohibit certain forms of fisheries subsidies which contribute to:*

**Components**

Overfishing

Illegal, unreported and unregulated (IUU) fishing

Destructive fishing practices

**Indicators**

14.4.1 Proportion of fish stocks within biologically sustainable levels

14.6.1 Degree of implementation of international IUU instruments

No specific measurement of progress

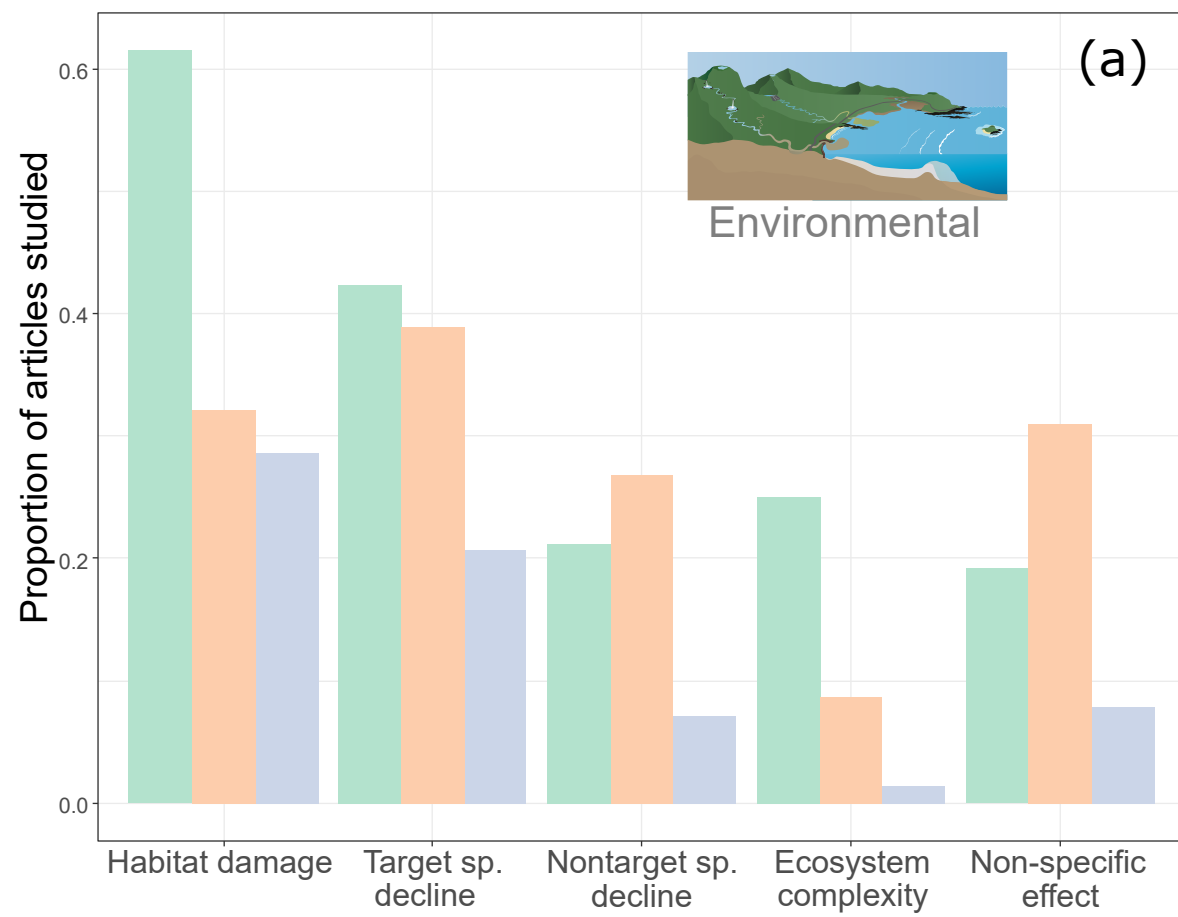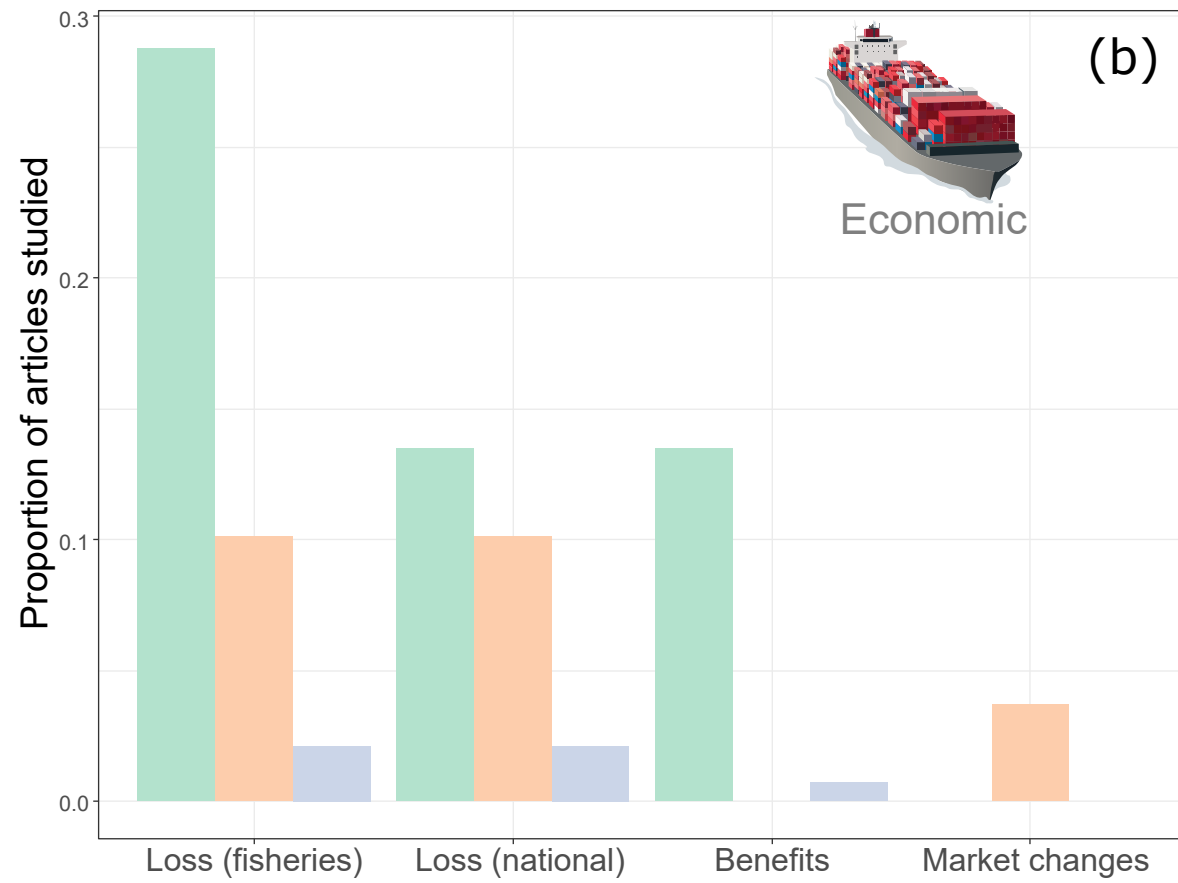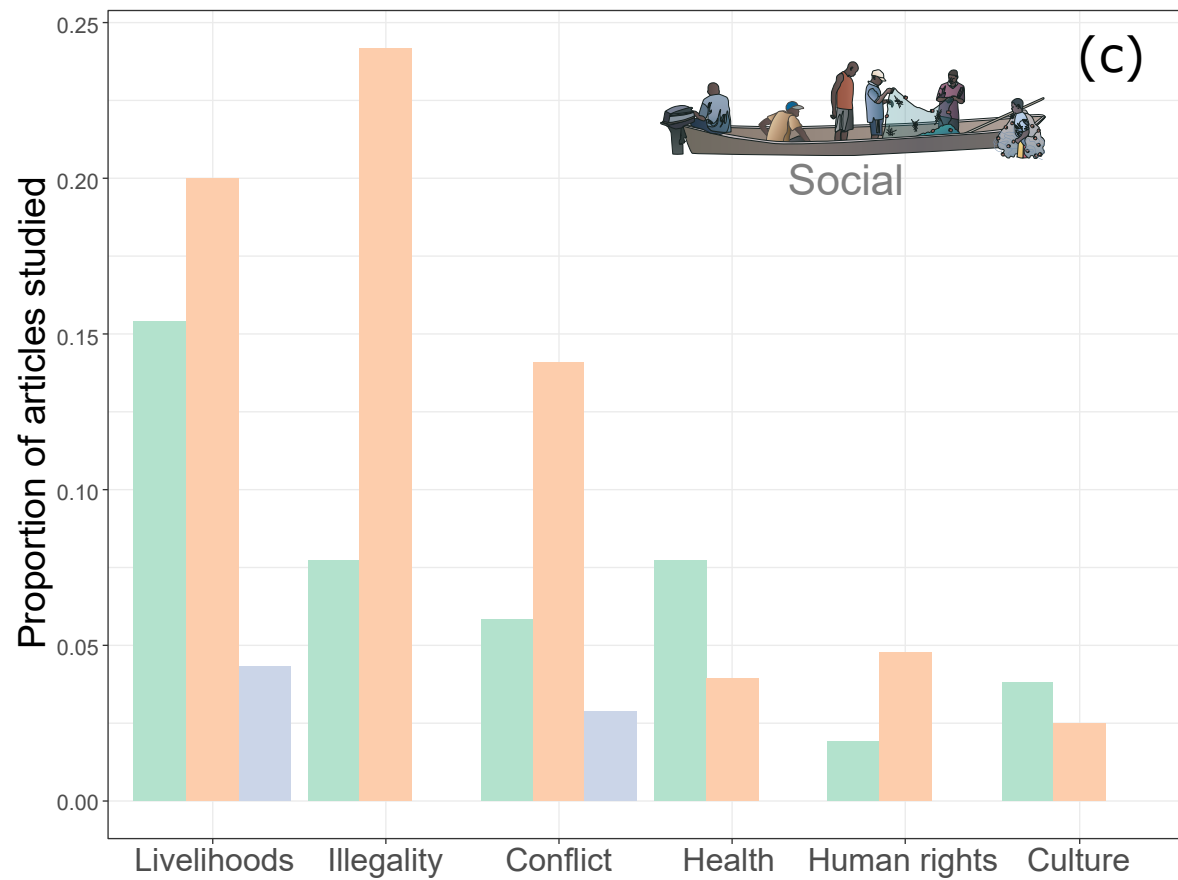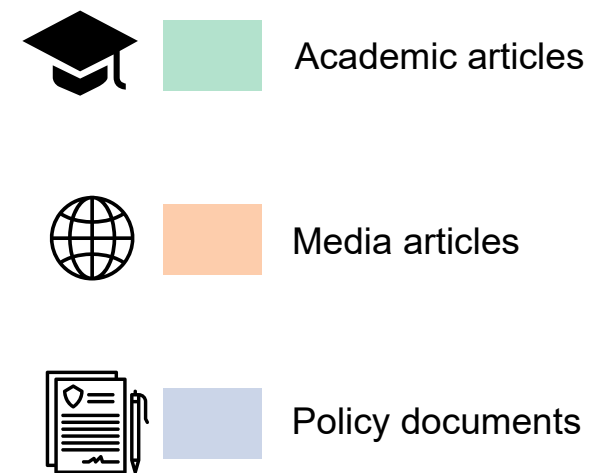

1995

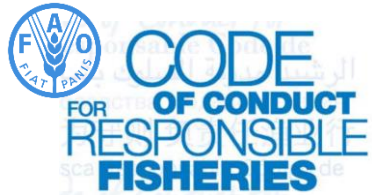

Article 8.4.2:

“States should **prohibit** dynamiting, poisoning and other comparable **destructive fishing practices**”

2004

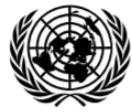

**General Assembly**

**Fifty-ninth session**

Resolution 59/25, Art 66:

“Calls upon States...to **take action urgently**, and consider the interim prohibition of **destructive fishing practices**”

2012

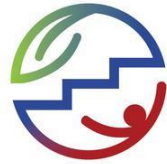

**RIO+20**  
United Nations  
Conference on  
Sustainable  
Development

Article 168:

“We commit to enhance action to manage by-catch, discards and other adverse ecosystem impacts from fisheries, including by **eliminating destructive fishing practices**”

2015

Voluntary Guidelines for Securing Sustainable Small-Scale Fisheries  
in the Context of Food Security and Poverty Eradication

Article 5.16:

“States should...**deter, prevent and eliminate** all forms of illegal and/or **destructive fishing practices** having a negative effect on marine and inland ecosystems.”

2016

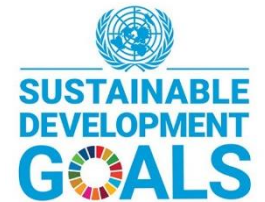

Target 14.4:

“By 2020, effectively regulate harvesting, and **end** overfishing, illegal, unreported and unregulated (IUU) fishing and **destructive fishing practices**”

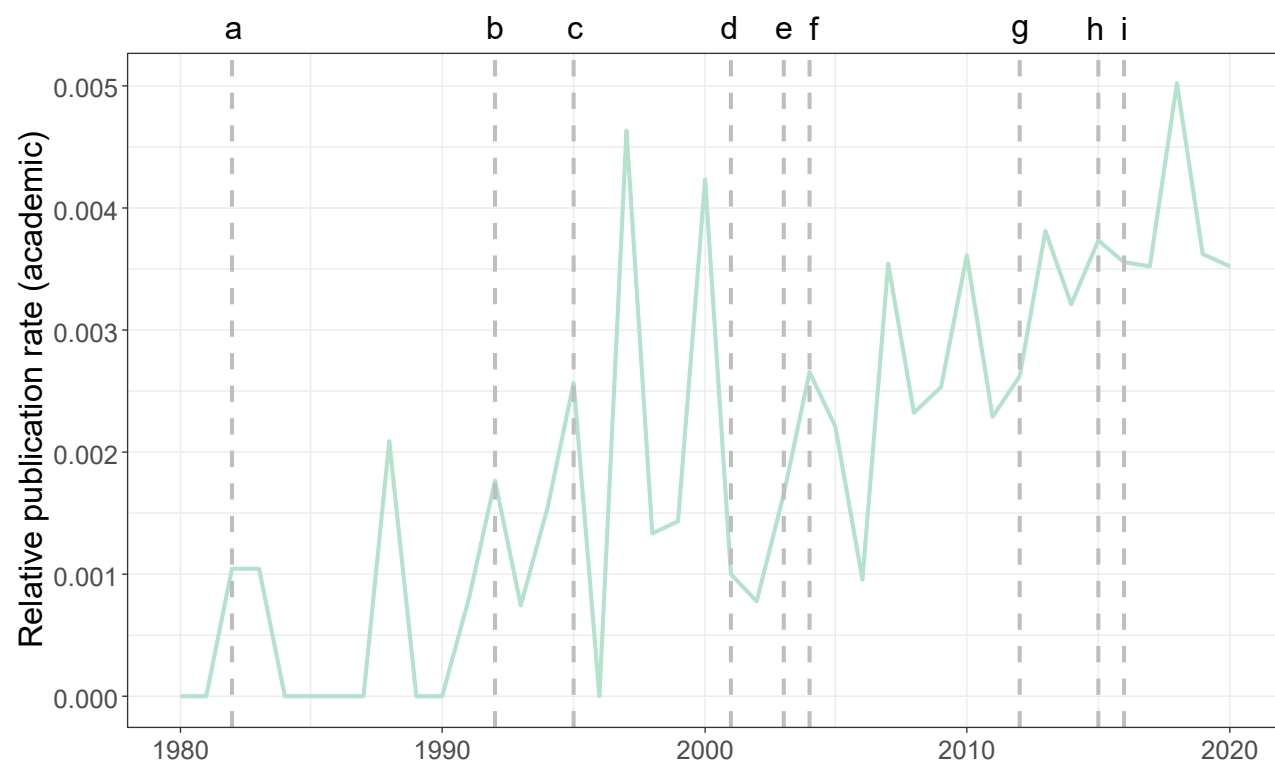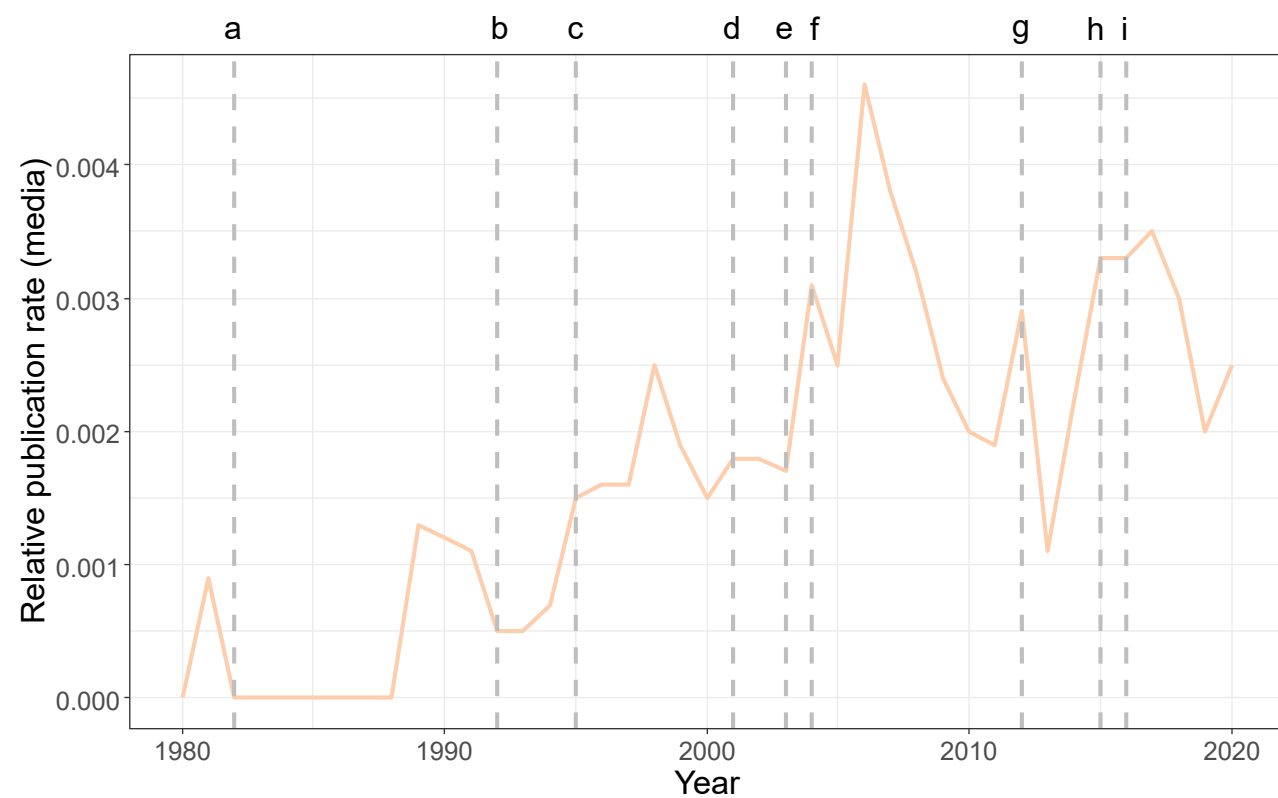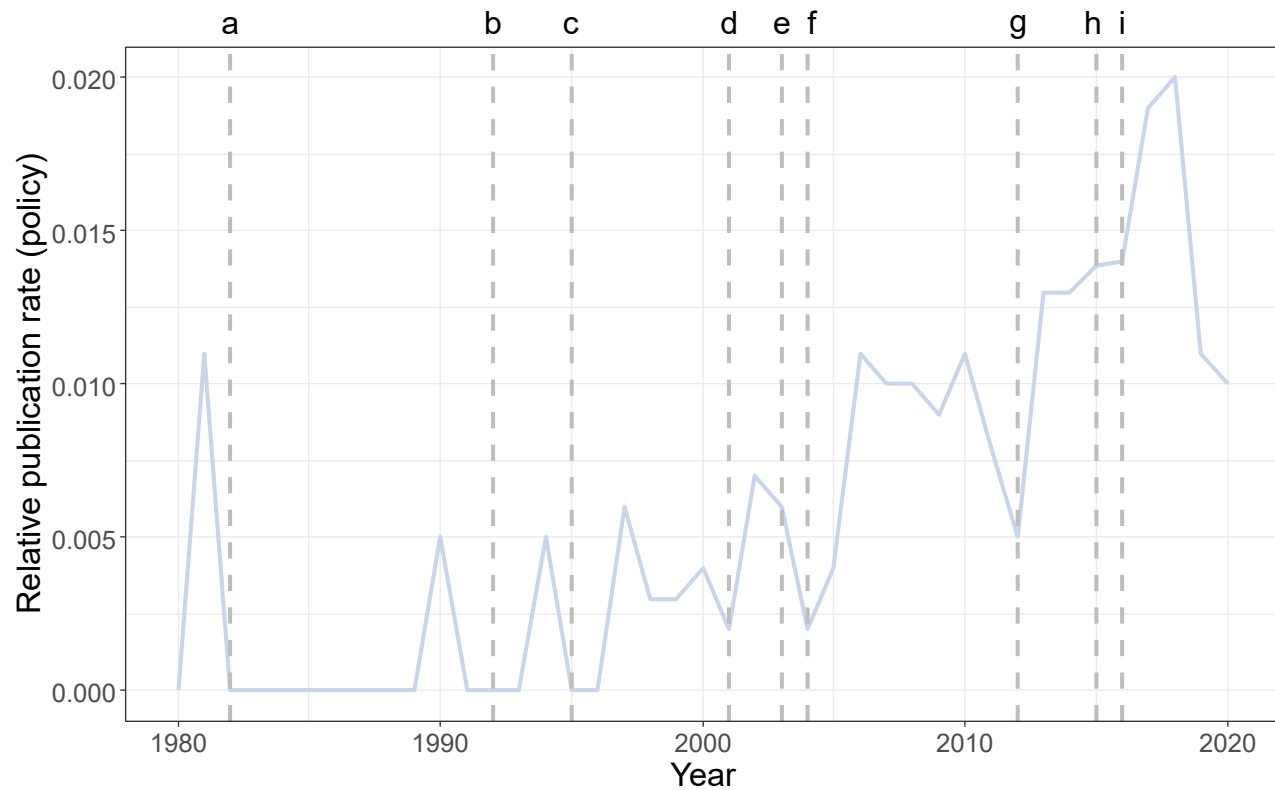

- a: UN Convention on the Law of the Sea
- b: Convention on Biological Diversity
- c: FAO Code of Conduct for Responsible Fisheries
- d: UN Fish Stocks Agreement
- e: FAO Compliance Agreement
- f: UN Resolution 59/25
- g: Rio +20 Sustainable Development Conference
- h: Guidelines for Securing SSF
- i: 2030 Agenda for Sustainable Development (SDGs)

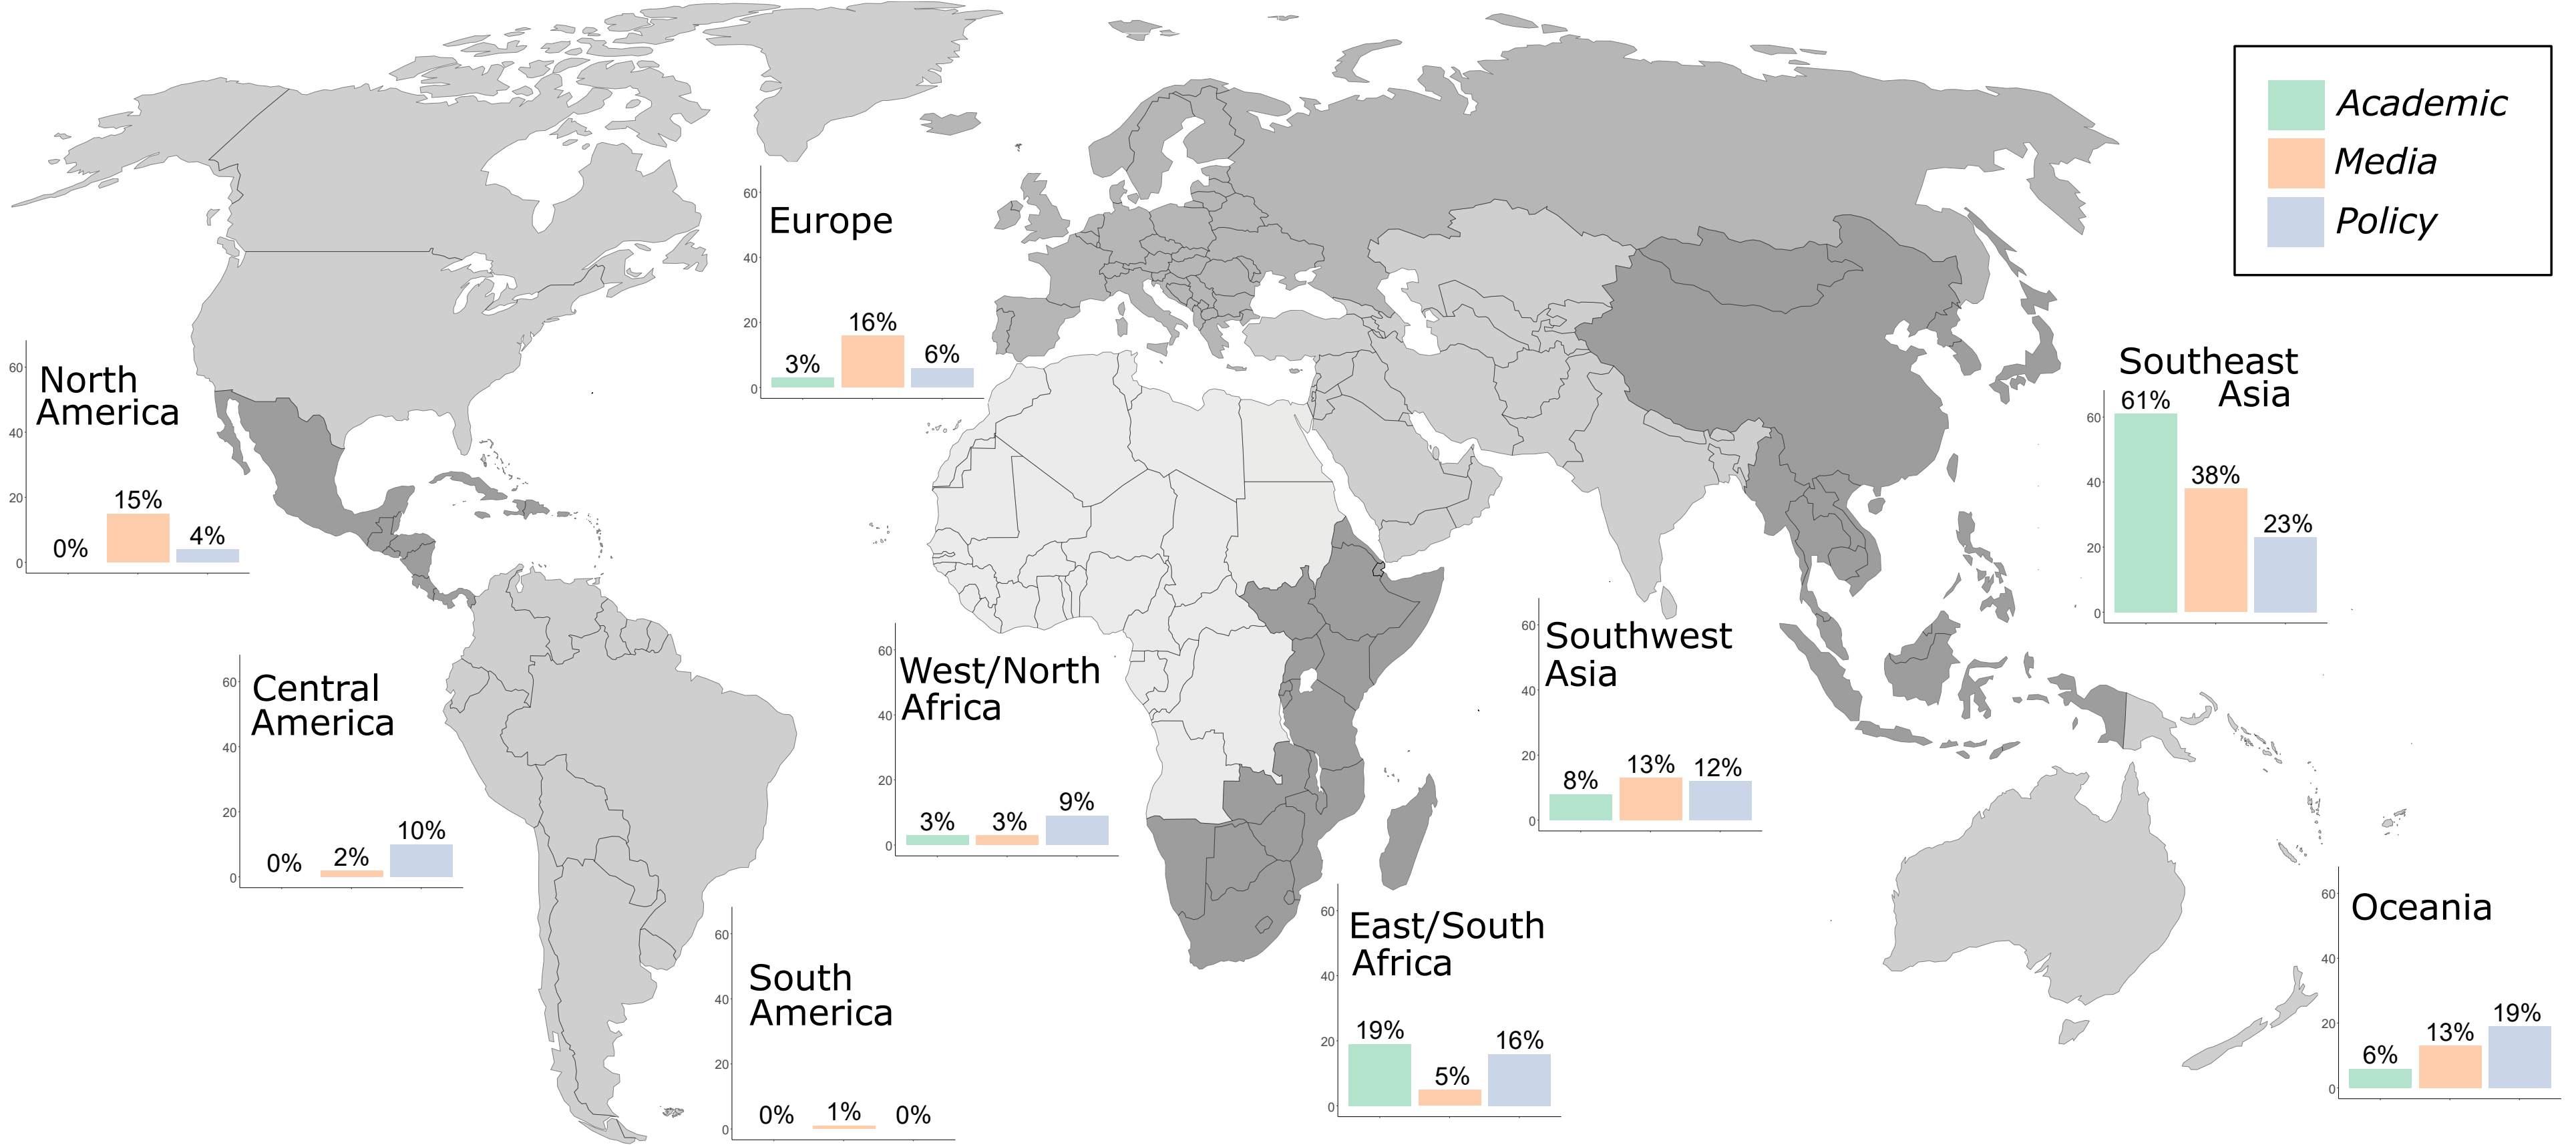

Source: https://www.biorxiv.org/content/10.1101/2021.05.07.443117v2.full.pdf
